# Supplementary material
Source: Springer Nature journal article supplement (https://www.springermedizin.de/resource/supplementary/13099_2012_62_MOESM2_ESM.pdf/9665508)

**A**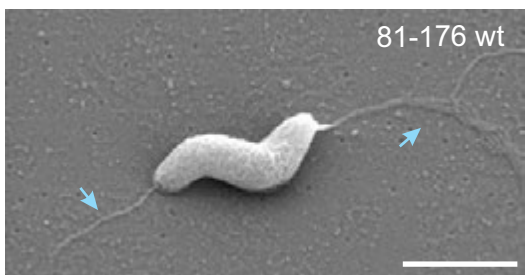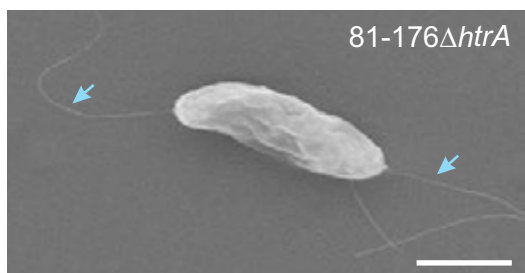**B**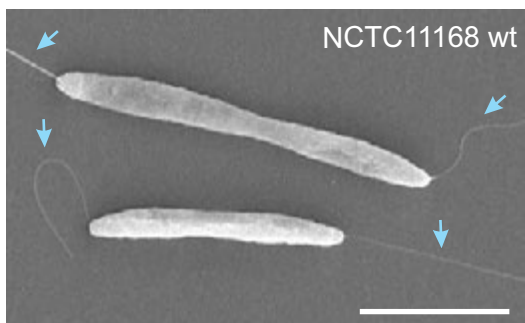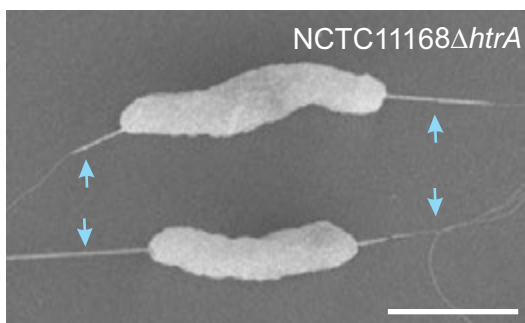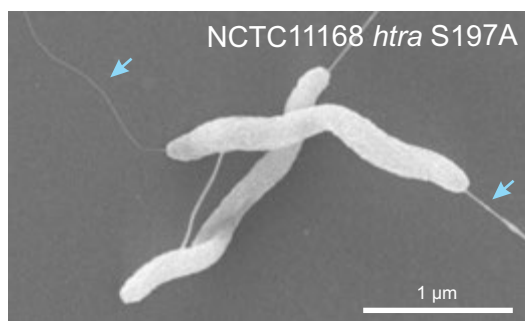

Supplement: MOESM2 [file 9665508]
